RESEARCH ARTICLE

# Genome-wide association studies and transcriptome analysis reveal novel genes associated with freezing tolerance in rapeseed (*Brassica napus* L.)

Guoqiang Zheng<sup>1</sup>, Zigang Liu<sup>1\*</sup>, Lixi Jiang<sup>2\*</sup>, Qi Yang<sup>3</sup>, Jiaping Wei<sup>1</sup>, Zefeng Wu<sup>1</sup>, Junmei Cui<sup>1</sup>, Xiaoyun Dong<sup>1</sup>, Xiaodong Cao<sup>4</sup>, Xuezheng Yang<sup>5</sup>, Ying Wang<sup>1</sup>, Yongjie Gong<sup>1</sup>, Ermei Sa<sup>1</sup>, Xiaoxia Wang<sup>1</sup>

**1** State Key Laboratory of Aridland Crop Science/College of Agronomy, Gansu Agricultural University, Lanzhou, Gansu, China, **2** College of agricultural & biotechnology, Zhejiang University, Hanzhou, Zhejiang, China, **3** Agricultural information center of Gansu Province, Lanzhou, Gansu, China, **4** Hybrid Rapeseed Research Center of Shaanxi Province, Yangling, Shaanxi, China, **5** Seed management station of Ping Liang, Pingliang, Gansu, China

\* [lzgworking@163.com](mailto:lzgworking@163.com) (ZL); [jianglx@zju.edu.cn](mailto:jianglx@zju.edu.cn) (LJ)

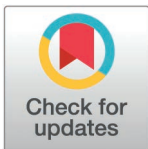

**OPEN ACCESS**

**Citation:** Zheng G, Liu Z, Jiang L, Wei J, Wu Z, Cui J, et al. (2025) Genome-wide association studies and transcriptome analysis reveal novel genes associated with freezing tolerance in rapeseed (*Brassica napus* L.). PLoS One 20(5): e0322547. <https://doi.org/10.1371/journal.pone.0322547>

**Editor:** Muhammad Qasim Shahid, South China Agricultural University, CHINA

**Received:** July 20, 2024

**Accepted:** March 20, 2025

**Published:** May 27, 2025

**Copyright:** © 2025 Zheng et al. This is an open access article distributed under the terms of the [Creative Commons Attribution License](https://creativecommons.org/licenses/by/4.0/), which permits unrestricted use, distribution, and reproduction in any medium, provided the original author and source are credited.

**Data availability statement:** All relevant data are within the paper and its [Supporting Information](#) files. All RNA-seq files are available from the SRA at NCBI database (accession number PRJNA685002).

## Abstract

Freezing stress is the main obstacle affecting the geographical distribution, growth, development, quality, and productivity of rapeseed (*Brassica napus*) in northern China. However, there is a little knowledge of rapeseed freezing tolerance mechanism. Here, 289 core germplasms collected from 36 countries were used to identify SNPs associated with freezing tolerance. We used RNA-seq data to narrow down the candidate genes identified by genome-wide association studies. The frequency distributions of phenotypic values and best linear unbiased estimates (BLUE) values for each trait conform to normal or approximately normal distributions, with good repeatability across various locations. The results showed that 594, 513, 7, and 45 SNPs were significantly associated with malondialdehyde, peroxidase, soluble protein, and relative electrolyte leakage, respectively. Based on these significantly associated SNPs, we identified 4,998 associated genes. Crossover analysis indicated that 73 genes were overlapped between GWAS and RNA-seq datasets, and 13 candidate genes involved in transmission and perception of freeze stress signals, lipid metabolism, reactive oxygen species (ROS) homeostasis, antifreeze proteins synthesis, and other metabolic processes. These results reveal novel genes associated with freezing tolerance in rapeseed, and provide a basis for further research and improvement of freezing tolerance in rapeseed.

## Introduction

Rapeseed is an important source of edible oil in many parts of the world. In China, rapeseed contains two major producing areas of winter rapeseed and spring

**Funding:** Scientific Research Start-up Funds for the Natural Science Foundation of China [32360520], Natural Science Foundation of Gansu Province [23JRRA1408], Gansu Province Science and Technology Major Project [22ZD6NA009], scientific and technological projects of Gansu Province [23CXJA0001], Key Talent Projects of Gansu Province [2023RCXM33], scientific and technological projects of Linzhi City [LZZX-04], and Innovator's Star project [2025CXZX]. The funders had no role in study design, data collection and analysis, decision to publish, or preparation of the manuscript.

**Competing interests:** The authors have declared that no competing interests exist.

rapeseed, and the northern boundary of the winter rapeseed producing area is generally 35° north latitude [1]. In winter, the lowest temperature in most winter rapeseed-producing areas is below 0 °C and lasts for a period of time, and the extreme low temperature is even lower than −15 °C [2,3]. Therefore, freezing tolerance is the most important and necessary characteristic of northern winter rapeseed cultivars. The freezing tolerance of rapeseed seedlings is a complex process affected by many factors, including environmental and genetic factors [4]. During production, freezing tolerance is also enhanced through winter soil covering or chemical spraying to reduce the impact of freezing stress on the yield and quality of rapeseed [5]. Due to the unpredictability of the climate, the effect is not remarkable, and it will increase the cost of planting. Therefore, identifying and characterizing freezing tolerance-related genes will help clarify the genetic mechanisms of freezing tolerance and will accelerate the breeding efficiency of freezing-tolerance cultivars in rapeseed.

Freezing tolerance is a complex quantitative trait, and numerous quantitative trait loci (QTL) for freezing tolerance have been detected in rapeseed through linkage mapping and genome-wide association studies (GWAS). A total of 16 QTLs were identified in 174 individual plant F2 and F2:3 populations [6]. Two major QTLs (*qOWRTA07* and *qOWRLA07*) were detected in two separate trials, with a single QTL explaining more than 10% of the phenotypic variation, and located between 21.4Mb and 23.4Mb on chromosome A7 (ZhongShuang11), which contains the gene encoding beta-1,3-glucanase (*BnAFP*). Overexpression of the beta-1,3-glucanase gene (*BraAFP*) results in enhanced freezing tolerance in transgenic Arabidopsis plants [7]. Meanwhile, the fragment from the −933 to −836 site away from the transcription start site of the *BrAFP1* promoter drives gene-specific expression in leaves and stems of winter rapeseed (*Brassica rapa* L.) under cold induction [8]. In addition, several SNPs associated with freezing stress were identified in the GWAS analysis of *Brassica napus*, and related genes were involved in plant photosystem protection, cell membrane stability and RNA integrity, lipid and fatty acid metabolism, photosynthesis, flowering, ubiquitination, and cytochrome P450-related proteins [9–12].

GWAS is an efficient strategy to identify functional genes controlling agronomic or quality traits, and the major challenge is the accurate evaluation of traits. Previous studies have shown that relative electrolyte leakage (REL), malondialdehyde (MDA) content, peroxidase (POD) activity, and soluble protein (SP) levels can be used to indirectly assess the freezing tolerance in rapeseed under freezing stress [13,14]. Meanwhile, the field conditions of freezing stress in this study provides a strong condition for the success of the experiment, compared with indoor simulation experiment. The core germplasm used in this study was selected from a worldwide collection of 991 *Brassica napus* genetic materials originating from 39 countries, representing more than 97% of the SNPs and indels of the 991-accession collection, to identify SNPs associated with REL, MDA, POD, and SP under freezing stress [15,16]. The objective of this study was to identify the specific genomic regions and core genes that regulate freezing tolerance in rapeseed. The results revealed the identification of 1,158 SNPs related to freezing tolerance traits, which is crucial for elucidating the genetic architecture and pinpointing additional genes that underlie freezing tolerance

in rapeseed. Meanwhile, specific genes under freezing stress by RNA-seq were used to narrow down the candidate genes. Ultimately, 73 genes were found to overlap between GWAS and RNA-seq results, and 13 candidate genes were identified as being involved in transmission and perception of freeze stress signals, lipid metabolism, ROS homeostasis, antifreeze protein synthesis, and other metabolic processes.

## Materials and methods

### Plant materials and growth conditions

The 289 core accessions of *Brassica napus* germplasm were selected from a worldwide germplasm collection of 991 accessions, and it is from Zhejiang University. The core accessions were sown and grown at the three experimental field locations, Tianshui of Gansu province ( $34^{\circ}.60'N, 105^{\circ}.64'E$ ), Jingchuan of Gansu province ( $35^{\circ}.37'N, 107^{\circ}.20'E$ ), and Yangling of Shaanxi province ( $34^{\circ}.27'N, 108^{\circ}.06'E$ ) to evaluate phenotypic values. Seeds were sown on August 19th in Jingchuan, on September 5th in Tianshui, and on September 20th in Yangling. When the minimum field temperature remained below  $-4^{\circ}C$  for three consecutive days, the third leaf was collected for phenotypic value measurement. Seedlings of genetic materials were harvested on November 25th in Jingchuan, on December 13th in Tianshui, and on December 21st in Yangling. The NS57, originating from the distant hybridization and cold acclimation between *Brassica napus* and *Brassica rapa*, has strong freezing tolerance in China's northwestern areas. The NF24 is a normal spring rapeseed cultivar with a survival rate of 0% below  $-10^{\circ}C$ . They are a typical combination for freezing tolerance research. The materials for RNA-seq (NF24 and NS57) were sown in pots (5L) filled with a 3:1 mixture of nutritional soil and vermiculite, and were grown in an illumination incubator under normal conditions ( $22/20^{\circ}C$ , day/night temperature, 16h/8h light/dark cycle). When the seedlings of two cultivars reached the five-leaf stage, they were transferred to the chamber for freezing treatment at  $-4^{\circ}C$  for 12h (Treatment 1, T1) and 24h (Treatment 2, T2), while the control group (control, T0) was maintained in normal conditions. The third leaf was taken from the same position on each plant, immediately frozen in liquid nitrogen, and stored at  $-80^{\circ}C$  for subsequent RNA extraction.

### Phenotypic data collection

The REL was determined using a digital conductometer DDS-11A (Leici Instrument Factory, Shanghai, China) according to the method described by Wei et al. [17]. The MDA, POD, and SP were determined using an ultraviolet spectrophotometer Evolution 260 (Thermo Fisher Scientific, USA). The activities of POD were estimated following the procedures of Chen et al [18]. MDA and SP were measured according to the methods of Wei et al. [19] and Florencia et al. [20], respectively. REL was determined using fresh leaves, while other indicators were frozen and preserved in liquid nitrogen. The BLUE of each trait at three locations and replicates were calculated, and GWAS was performed.

### Genome-wide association study of four phenotypic values

The SNPs among the 289 accessions were downloaded from a website, which was identified in our previous study of the 991 accessions [16]. Using PLINK software with Minor Allele Frequency (MAF)  $> 0.05$ , genotyping rate (geno)  $< 0.5$  as the standard for quality control, 2,944,851 high-quality SNPs were identified in the 289 cultivars. Then, SNPs with uncertain chromosome locations in rapeseed were deleted, and a total of 2,284,466 SNPs were used for the GWAS. Principal component analysis (PCA) was performed using PLINK software. Admixture software was used to construct Q matrix of population structure. The K-value, representing the genetic relationships between samples, was calculated using Tassel 5.2 software. The Tassel 5.2 software with general linear model (GLM) and mixed linear model (MLM) was used for GWAS. In the MLM, Q- and K-values were used as fixed and random factors, while only Q-values were used in the GLM. After the analysis, the optimal model was selected based on the QQ plot for subsequent analysis. The p-value of each SNP was calculated, and a threshold of  $-\log_{10}P > 6$  was defined as the suggestive. Meanwhile, when more than 30 significant loci

were identified for a trait, the top 30 were selected to search neighboring genes. Then, 100kb sequence regions adjacent to the significantly associated SNPs were searched for the associate genes.

### KEGG enrichment and GO annotation analysis of neighboring genes

The neighboring genes identified from GWAS were annotated against Gene Ontology (GO) database and Kyoto Encyclopedia of Genes and Genomes (KEGG) database. The GO analysis was categorized into biological processes (BP), molecular functions (MF), and cellular components (CC).

### RNA-seq analysis and Crossover analysis with GWAS

Total RNA was extracted from treatment and control samples, each containing three biological replicates, was extracted using the TRIzol Reagent (Tiangen Biotech, China) according to the manufacturer's instructions. The library construction and sequencing were performed by Gene Denovo Biotechnology Co. (Guangzhou, China) on the Illumina HiSeq™ 2500 platform. The reads containing adapters, reads containing poly-N, and low-quality reads from the raw data were removed using the Trimmomatic software. The short reads alignment tool Bowtie2 was used for mapping reads to the ribosome RNA (rRNA) database. The ribosome RNA (rRNA) mapped reads were removed [21]. Clean reads were subsequently mapped to the *Brassica napus* reference genome (Da-Ae) using TopHat2 software. The expression level was normalized by calculating the fragments per kilobase of exon model per million mapped fragments (FPKM) value. The DEGs between both samples were identified using the criteria of a  $p$ -value  $< 0.01$  and  $|\log_2 \text{fold change}| \geq 1$ . Local BLAST of protein sequences was used to convert IDs between different reference genomes. Then, the DEGs with significant differences between cultivars under freezing stress were used to narrow down the identified candidate genes.

### Transcription factors identified of neighboring genes

The TF database of *Brassica napus* was retrieved from the Plant TFDB v5.0 database. The expression data for the TFs were from the RNA-seq data. The genes were integrated into the R Programming language according to the IDs from the *Darmor* database.

## Result

### Genotype features of 289 genetic materials

The 289 genetic materials from all over the world included 56 of spring rapeseed accessions, 53 semi-winter rapeseed accessions and 180 winter rapeseed accessions (S1 Table). Evidence from previous studies indicates that core-accessions population represent majority of the genetic diversity of the 991-accessions population. In this study, we re-filtered the resequencing data to obtain 2,944,851 high-quality SNPs. A PCA plot of the first two components (PC1 and PC2) of the 289 genetic materials is shown in Fig 1a, and three different types of rapeseeds are grouped separately. After removing SNPs with uncertain chromosomal locations, 2,284,466 SNPs were distributed across the 19 rapeseed chromosomes (Fig 1b). The number of SNPs per chromosomes of C03 is largest, and lowest for A08. The average number of SNPs per 1 kb of chromosomes was more than 2.46, and with the highest density observed on chromosome A04 (S1 Fig).

### Phenotypic features of the indices related to cold tolerance

When the minimum field temperature was below  $-4$  °C and lasted for three days, phenotypic values were obtained from the core-accessions. Meanwhile, the BLUE for each trait was calculated with the locations, replicates as random factors and genotypes as fixed factors. The frequency distributions of phenotypic values and BLUE values for each trait conform to normal or approximately normal distributions (Fig 2a-d and S2 Fig). The phenotypic values of three biotypes showed obvious differences, and the MDA and REL values of winter rapeseed seedlings were significantly lower than those of

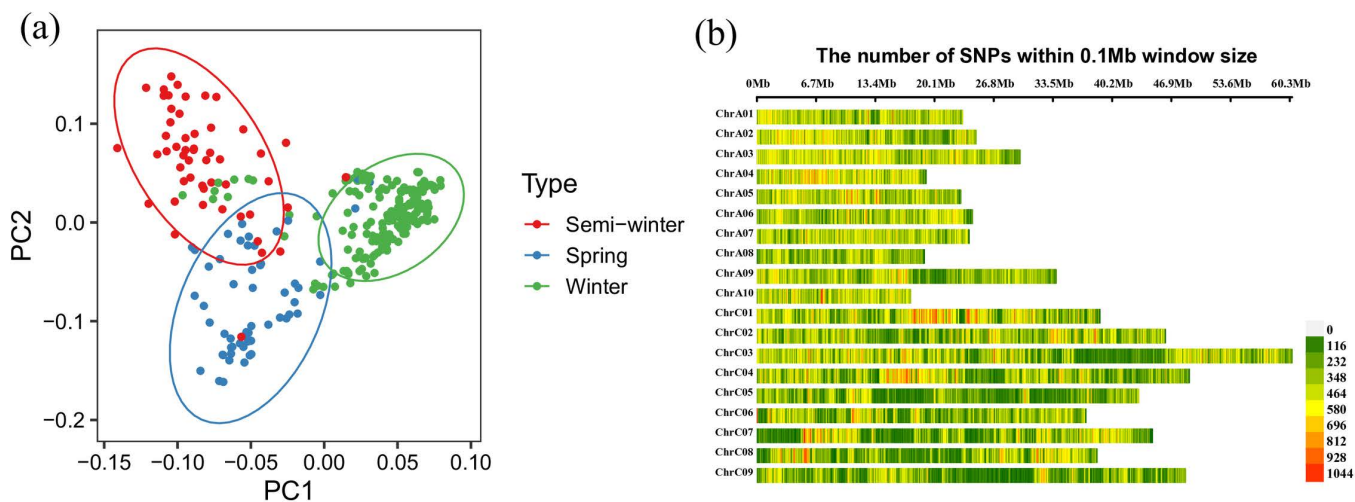

**Fig 1. Genetic polymorphism of the 289 core accessions revealed by genome resequencing.** (a) principal component analysis (PCA) plot of two components (PC1, PC2) using single-nucleotide polymorphisms (SNPs). (b) Single nucleotide polymorphism (SNP) density within a 0.1Mb window size on the 19 chromosomes of 289 resequenced genomes.

<https://doi.org/10.1371/journal.pone.0322547.g001>

semi-winter/spring rapeseeds, while the values of POD and SP were higher (Fig 3a-d and S3 Fig). The correlation coefficients ( $r$ ) of the four phenotypes at the three experimental locations were provided in S2 Table. Overall, MDA exhibited a positive correlation with REL, while SP showed a positive correlation with POD. Additionally, MDA and REL were negatively correlated with both SP and POD.

### Genome-wide association analysis of freezing stress-related indices

GWAS were performed for the four phenotypic traits of 289 core accessions in three locations and BLUE values. In total, 594, 513, 7, and 45 SNPs were significantly associated with MDA, POD, SP and REL values (Fig 4 and S4 Fig). Based on these significantly associated SNPs, we identified 4,998 associated genes (S3 Table). KEGG enrichment analysis showed that these genes were involved in anthocyanin biosynthesis, cyanoamino acid metabolism, basal transcription factors, ascorbate and aldarate metabolism, biosynthesis of various plant secondary metabolites, etc (Fig 5a). GO classification annotation found that these genes were annotated to 101 functional categories, including 79 biological processes, 11 molecular functions, and 11 cellular components (Fig 5b). Among these biological processes, response to molecules of fungal origin, flavonoid metabolic process, topologically incorrect protein, anthocyanin-containing compound metabolic process were the most significant. MAP kinase activity, protein folding chaperone, beta-glucosidase activity, and glucosidase activity were the most represented GO categories in the molecular functions. At the same time, the polysome, cytosolic proteasome complex, and phosphatidylinositol 3-kinase complex were the top three significantly dominant cellular components.

### Differences in gene expression between two cultivars

In order to test transcription-level changes, a pair of freezing-sensitive and freezing-resistant cultivars, NF24 and NS57, were used for transcriptome sequencing, consisting of three replicates and three treatments. The high-quality clean reads per library were exceeded 39 million, the Q30 for all libraries was greater than 94%, and the GC content per library was approximately 48%. For all libraries, over 77% of reads were uniquely mapped to the reference genome and the mapping ratio was close to 80%. At the normal temperature, 6,609 DEGs were identified between

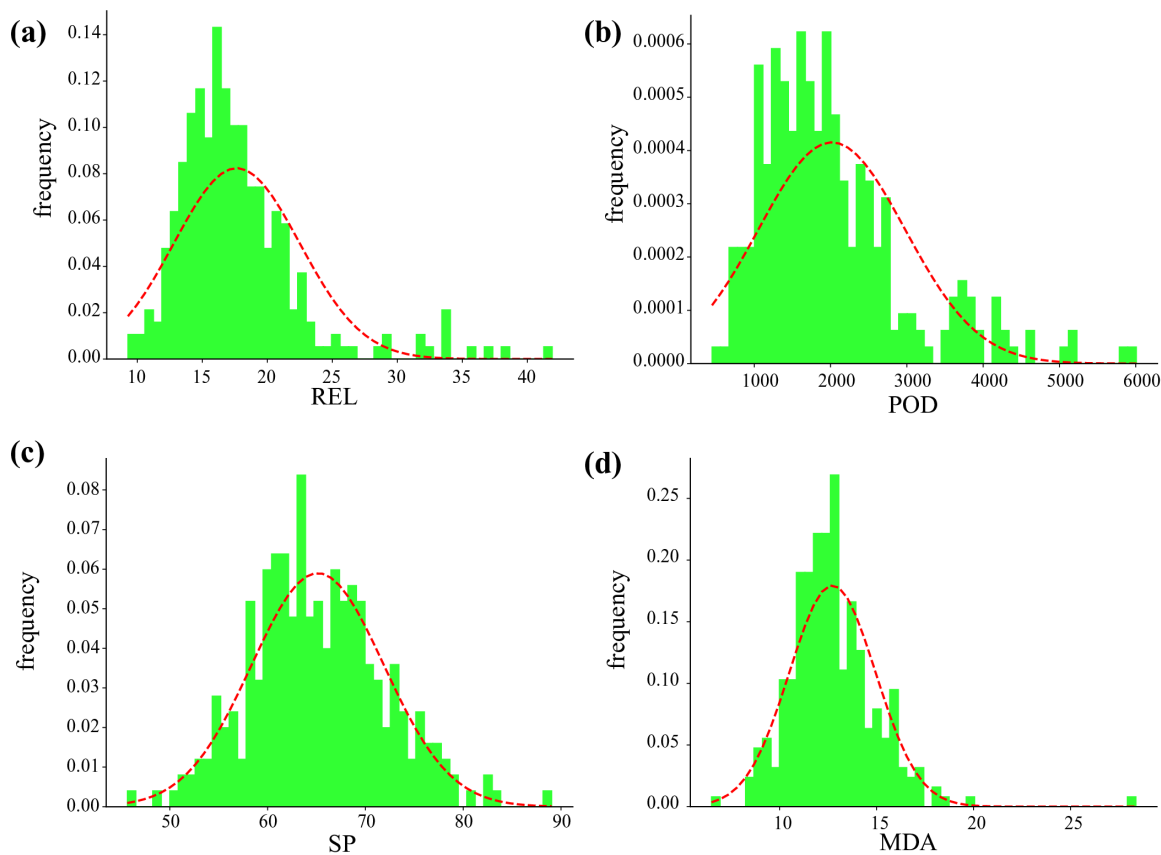

**Fig 2. The frequency distributions map of phenotypic BLUE values in 289 core accessions at different locations.** (a) The BLUE value of REL. (b) The BLUE value of POD. (c) The BLUE value of SP. (d) The BLUE value of MDA.

<https://doi.org/10.1371/journal.pone.0322547.g002>

two cultivars, including 3,840 upregulated and 2,869 downregulated DEGs. After T1 freezing stress, 6,621 DEGs were found to be accumulated between the two cultivars, including 4,100 upregulated and 2,521 downregulated DEGs. Meanwhile, 7,305 DEGs were identified between the two cultivars under T2 freezing stress, including 3,692 upregulated and 3,613 downregulated DEGs. Finally, 1,624 DEGs were common to both T1 and T2 stress, which were specific to freezing stress. These genes likely from the basis for freezing tolerance variation in rapeseed (Fig 6a). Therefore, these 1,624 genes utilized for further intersection analysis between the candidates identified through GWAS and RNA-seq.

### Crossover analysis between the candidates identified by GWAS and RNA-seq

RNA-seq analysis was used to narrow down the candidate genes identified by GWAS, which helps to improve the efficiency and accuracy of identification. After consistent reference genomes, the 3,730 genes were successfully converted from 4,998 neighboring genes, corresponding to 3,741 unique genes. The crossover analysis showed that 73 genes were overlapping (Fig 6b). The IDs of the candidate genes and their annotations are listed in (Table 1) S1 Table. And among these, 13 of these genes are more closely related to freezing stress and are potential candidates for further research. They are involved in the transmission and perception of freezing stress signals, lipid metabolism, ROS homeostasis, anti-freeze protein synthesis, and other metabolic processes.

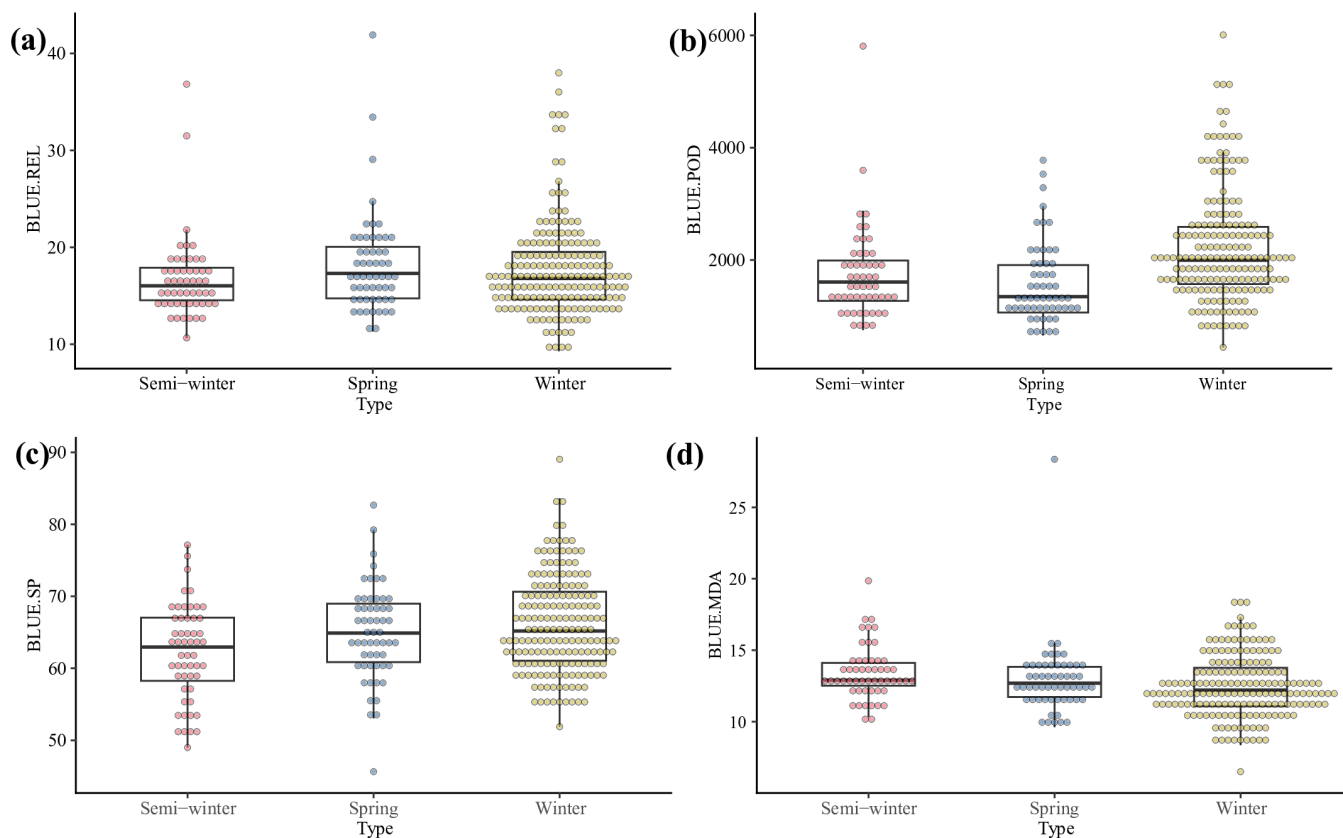

**Fig 3. Box plot of phenotypic BLUE values in 289 core accessions at different locations.** (a) The BLUE value of REL. (b) The BLUE value of POD. (c) The BLUE value of SP. (d) The BLUE value of MDA.

<https://doi.org/10.1371/journal.pone.0322547.g003>

### Transcription factors identified for neighboring genes

The neighboring genes were annotated to transcription factors database to further understand the function. The result showed that 268 non-redundant TFs were predicted, which belonged to 46 TF families (Fig 7a). The MYB (34 members) was the TF family with the most members, including 22 MYB and 12 MYB-related members, and ERF was the second-largest TF family with 21 members. The bHLH was in third place (20 members), followed by the bZIP (15), NAC (13), and C2H2 (12). Among these TFs, only 36 TFs were expressed with expression in FPKM value  $\geq 1$ . The expression levels of 25 TF genes significantly altered under freezing stress, whereas the expression of 8 TF genes remained consistent between two varieties (Fig 7b). These transcription factors may play a crucial role in *Brassica napus* freezing tolerance, including bZIP, bHLH, NAC, Trihelix, NF-YB, and LBD. The bZIP, NAC were upregulated under freezing stress, while the other TFs were downregulated.

### Discussion

Winter freezing stress is one of the key limiting factors for rapeseed cultivation in northwest China [22]. The scarcity of freezing-tolerant genetic resources and cultivars led to winter rapeseed difficult to overwinter in these areas, thereby restricting its further northern expansion of winter rapeseed growing areas [3]. Thus, the identification and utilization of novel genes and genetic resources associated with freezing tolerance is important for improving the freezing tolerance of winter rapeseed. This can accelerate the northward migration of *brassica napus* to replace the winter turnip rape

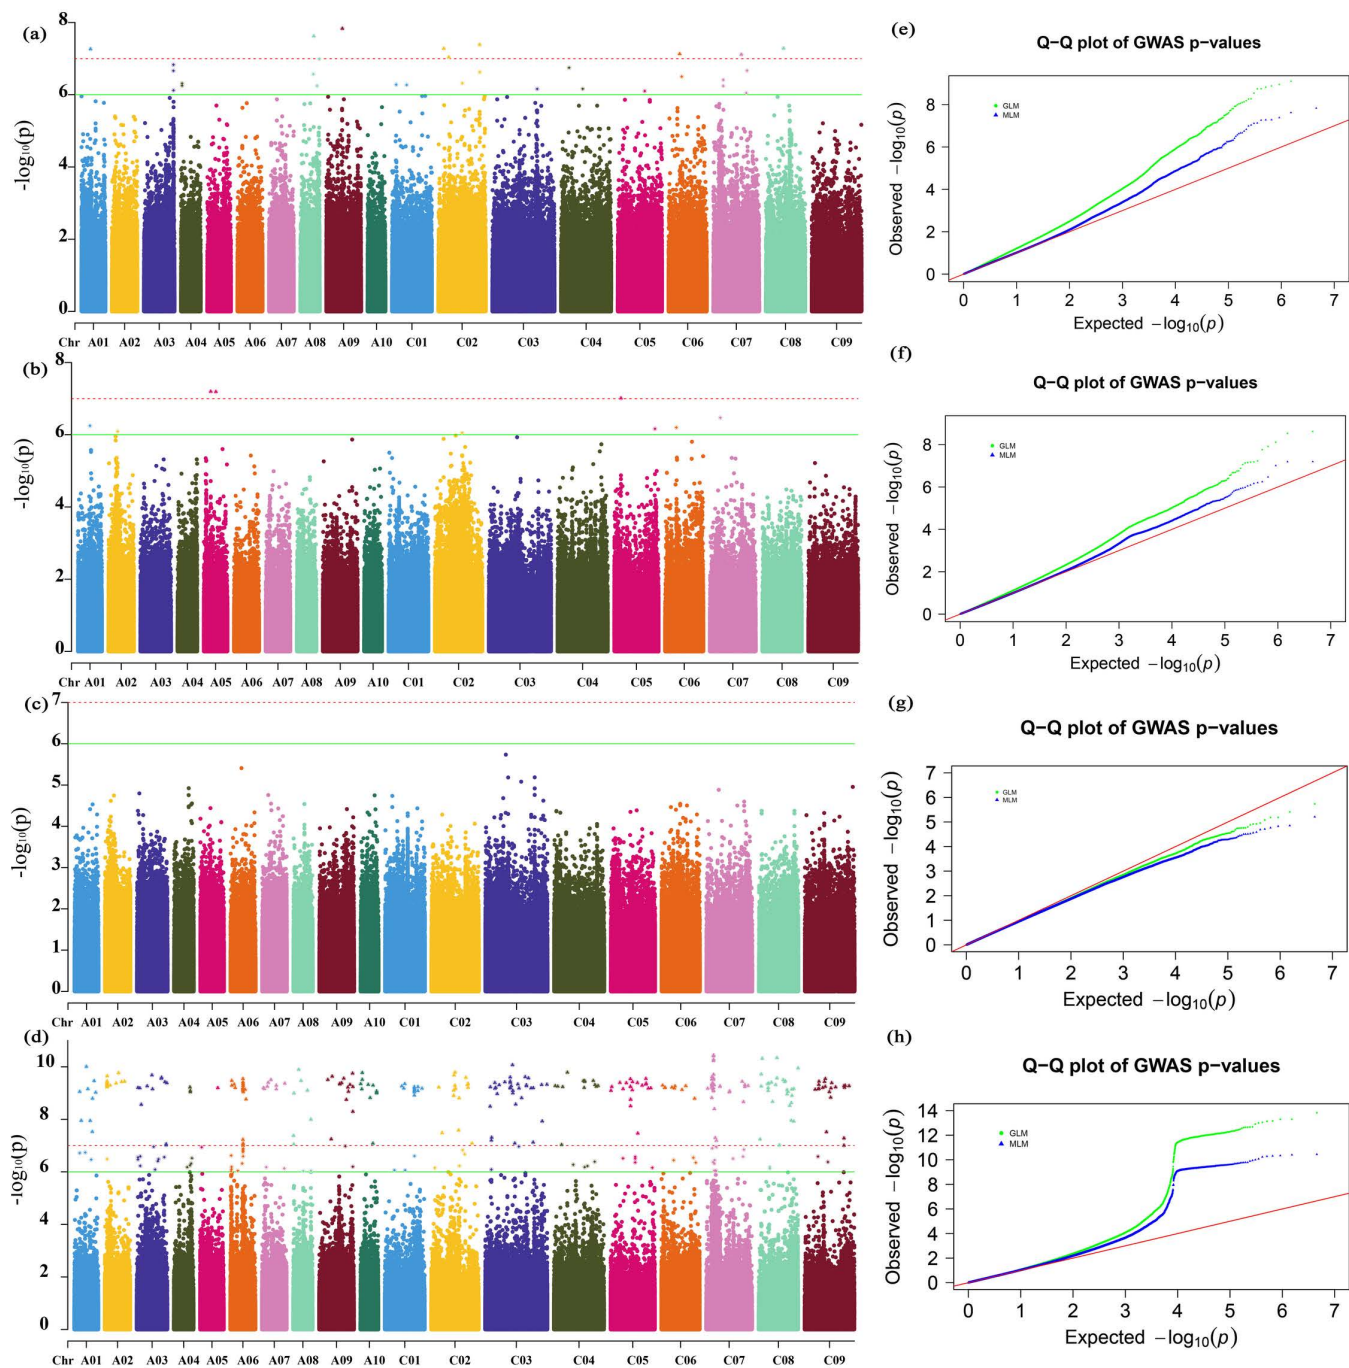

**Fig 4. Manhattan plots and QQ plots of GWAS for BLUE.** (a, e) the BLUE of REL among three locations. (b, f) the BLUE of POD among three locations. (c, g) the BLUE of SP among three locations. (d, h) the BLUE of MDA among three locations.

<https://doi.org/10.1371/journal.pone.0322547.g004>

(*Brassica rapa*) with strong freezing tolerance and low quality and yield. A substantial body of evidence indicates that freezing stress damages cell membranes, as ice nuclei form intracellularly at sub-zero temperatures, leading to cellular water loss, extracellular leakage of intracellular substances, and an increase in relative electrolyte leakage (REL) [23].

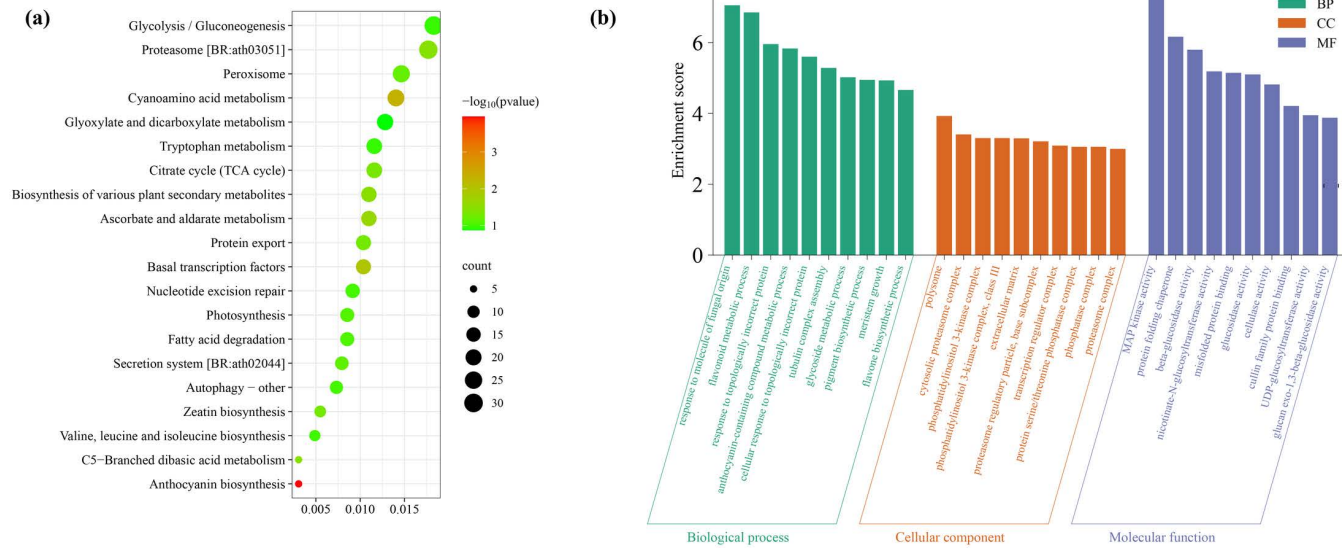

**Fig 5. The pathway enriched of 4,998 neighboring genes.** (a) the KEGG pathways of neighboring genes. (b) the GO classification annotation of neighboring genes.

<https://doi.org/10.1371/journal.pone.0322547.g005>

In the present study, we found that REL was negatively correlated with freezing tolerance, and the REL of spring rape reached its highest level following freezing stress. Additionally, lipid, which are the primary component of cell membranes, are oxidized to malondialdehyde (MDA) under various stress conditions [13]. Furthermore, peroxidase (POD), an oxidoreductase in plants, plays a crucial role in reduction reaction of  $H_2O_2$  [24]. Soluble protein (SP) enhance plant intracellular osmosis, thereby inhibiting the formation of initial ice nuclei under freezing stress [25]. These studies have been demonstrated that freezing-tolerant cultivars exhibit higher levels of POD and SP under freezing stress, while MDA levels are lower [2,17].

GWAS is an efficient strategy to identify functional genes controlling agronomic or quality traits, which is widely used to locate plant stress-related genes [26–28]. Under drought stress, GWAS identified 1,281 SNPs associated with agronomy and yield-related traits in rapeseed, leading to the identification of 2,232 candidate genes within their linkage disequilibrium (LD) regions [29]. Analysis of another GWAS revealed the identification of 60 candidate genes related to drought stress, among which 18 were involved in phenylpropanoid pathway and flavonoid modifications, including *phenylalanine ammonia-lyase 1-like (PAL1)*, *chalcone-flavanone isomerase (CHI)*, *flavonol 3-O-glucosyltransferase (UGT89B1)*, *flavonol synthase3 (FLS3)*, *cinnamoyl-CoA reductase 1 (CCR1)*, and *flavonoid 3'-monooxygenase (CYP75B137)* [30]. In freeze stress studies, the chlorophyll fluorescence and average damage index of 399 canola cultivars frozen at  $-15^{\circ}C$  for 3 days and 7 days were used as traits for GWAS analysis [10]. This resulted in the identification of 13 SNP loci related to the cold tolerance, with 25 candidate genes screened within their LD intervals, primarily involved in physiological and molecular processes such as plant photosystem protection, cell membrane stability, and RNA integrity. In the same year, another GWAS study on 222 canola cultivars identified 13 SNPs and 24 candidate genes associated with freezing tolerance in rapeseed [9]. Functional annotation indicated that these genes encoded proteins related to lipid and fatty acid metabolism, photosynthesis, flowering, ubiquitination and cytochrome P450. In contrast, our 289 cultivars contained more SNP loci, which would greatly improve the efficiency of GWAS detection. Our study uncovered 1,158 SNPs across nineteen chromosomes correlated with variation in freezing stress-related indices through GWAS analysis. Additionally, we identified 4,998 neighboring genes located within 100 kb upstream or downstream of these partially significant SNP (Fig 4 and S4 Fig).





contains the gene encoding protein phosphatase 2C (PP2C) [11]. *PP2C*, as a negative regulator of serine/threonine protein phosphatase, plays an important role in abscisic acid (ABA) and abiotic-stress-mediated signaling pathways in plant [44]. In wheat, phenotypic analysis of overexpression and CRASP/Cas9 mutant lines indicated that *TaPP2C158* was a negative regulator responsible for drought resistance [45]. However, genome-wide identification of the PP2C gene family of wild sugarcane showed that a total of 27 genes were induced expressions by cold stress [46]. Therefore, it is plausible that *PP2C* may exhibit diverse regulatory mechanisms in response to different types of stress. *BnaA07g30430D*, a putative orthologs of *PP2C*, exhibited higher expression levels in the freezing-tolerance cultivars compared to freezing-sensitive ones, implying that the *BnPP2C* may function as a positive regulator of freezing stress responses in this context.

The balance of reactive oxygen species (ROS) is broken under freezing stress, leading to the activation of metabolic pathways and genes related to plant oxidative stress [47]. NAD(P)H dehydrogenase functions in alleviation of oxidative damage caused by temperature stress [48]. Following freezing stress, the expression levels of two homologs encoding NAD(P)H dehydrogenase increased, with significantly higher expression observed in freezing-tolerance cultivars compared to freezing-sensitive ones. Similarly, a gene encoding alcohol dehydrogenase exhibited an expression pattern consistent with the aforementioned NAD(P)H dehydrogenase genes. In contrast, the expression levels of two genes encoding NAD(P)H-quinone oxidoreductase subunits *M/N* decreased after expose to freezing stress. *Ascorbate peroxidase (APX)* is a crucial antioxidant enzyme that plays a significant role in H<sub>2</sub>O<sub>2</sub> scavenging system of the ascorbate-glutathione cycle in plant cells [49]. In eggplants, members of the APX family have shown responses to high temperatures, especially *SmAPX2* [50]. Silencing *SmAPX2* has resulted in a notable reduction in stress resistance. It has been proved that *APX* is closely related to the abiotic stress of *Brassica rapa* [51]. In this study, a gene encoding *BnAPX* was also detected, and its expression increased more than twofold in both cultivars under freezing stress. Notably, the expression level was higher than in freezing-tolerance cultivar compared to the freezing-sensitive cultivar.

In response cold stress, Ca<sup>2+</sup> plays an important role in the sensing and transmission of stress signals, and calmodulin and *calcium-binding protein CML27* are key components of calcium signaling pathway [52]. The RNA-seq data showed that their expression levels in the winter rapeseed leaves increased 1–3 fold after freezing stress, with a more pronounced increase observed in freezing-resistant cultivars. *Lipoxygenase (LOX)* is a non-heme iron-containing dioxygenase family that catalyzes the oxygenation of polyunsaturated fatty acids into bio-functionally acid diverse (oxylipins) and plays a vital role in plant growth, development, and responses to abiotic stress [53]. The RNA-seq data showed that it was upregulated expression more than sixfold in both cultivars 24 hours after freezing stress. In addition to the above genes, we also detected other related genes, but the relationship between these genes and freezing stress response in rapeseed needs further investigation and analysis.

## Conclusion

In summary, a total of 1,158 SNPs and 4,998 neighboring genes were identified across nineteen chromosomes. Crossover analysis between the candidates identified by GWAS and RNA-seq identified 73 overlapping genes. Combined with gene annotation and gene expression data, 13 genes were determined to be more closely related to freezing tolerance in rapeseed. These data can provide new genes resource for further investigation into the mechanism of freezing tolerance in rapeseed.

## Supporting information

**S1 Fig. The average number of SNPs per 1 kb and number of SNPs per chromosome.**  
(TIF)

**S2 Fig. Frequency distributions of four traits in 289 core accessions.** (a-d) Frequency distributions of REL, POD, SP, and MDA in Jingchuan location. (e-h) Frequency distributions of REL, POD, SP, and MDA in Tianshui location. (i-l) Frequency distributions of REL, POD, SP, and MDA in Yangling location.  
(TIF)

**S3 Fig. Box plot of four traits in 289 core accessions.** (a-d) Box plot of REL, POD, SP, and MDA in Jingchuang location. (e-h) Box plot of REL, POD, SP, and MDA in Tianshui location. (i-l) Box plot of REL, POD, SP, and MDA in Yangling location.

(TIF)

**S4 Fig. Manhattan plots of GWAS for four phenotypes value.** (a-d) Manhattan plot of REL, POD, SP, and MDA in Jingchuang location. (e-h) Manhattan plot of REL, POD, SP, and MDA in Tianshui location. (i-l) Manhattan plot of REL, POD, SP, and MDA in Yangling location.

(TIF)

**S1 Table. Source information for 289 genetic materials.**

(XLSX)

**S2 Table. The correlation coefficients of the REL, POD, SP, and MDA at the three locations and BLUE value.**

(XLSX)

**S3 Table. The genes were associated with significantly SNPs.**

(XLSX)

**S1 File. Assign automatically.**

(DOCX)

## Acknowledgments

Thanks to Professor Lixi Jiang of Zhejiang University for providing material support for this research.

## Author contributions

**Conceptualization:** Guoqiang Zheng, Zigang Liu.

**Data curation:** Xiaodong Cao.

**Formal analysis:** Guoqiang Zheng, Qi Yang.

**Investigation:** Guoqiang Zheng, Xiaoyun Dong, Xuezhen Yang, Ying Wang, Yongjie Gong, Ermei Sa, Xiaoxia Wang.

**Methodology:** Zefeng Wu.

**Project administration:** Jiaping Wei.

**Resources:** Zigang Liu, Lixi Jiang.

**Software:** Guoqiang Zheng.

**Supervision:** Junmei Cui.

**Visualization:** Guoqiang Zheng.

**Writing – original draft:** Guoqiang Zheng.

**Writing – review & editing:** Jiaping Wei, Zefeng Wu, Junmei Cui, Qi Yang.

## References

1. Pu Y, Zhao Y, Wu J, Liu L, Bai J, Ma L. Comprehensive assessment on cold tolerance of the strong winter brassica napus L. cultivated in Northern China. *Scientia Agricultura Sinica*. 2019;52(19):3291–308. <https://doi.org/10.3864/j.issn.0578-1752.2019.19.002>
2. Wei J, Zheng G, Yu X, Liu S, Dong X, Cao X, et al. Comparative Transcriptomics and Proteomics Analyses of Leaves Reveals a Freezing Stress-Responsive Molecular Network in Winter Rapeseed (*Brassica rapa* L.). *Front Plant Sci*. 2021;12:664311. <https://doi.org/10.3389/fpls.2021.664311> PMID: [33995460](https://pubmed.ncbi.nlm.nih.gov/33995460/)

3. Cao X, Liu Z, Mi W, Xu C, Zou Y, Xu M. Analysis on the adaptability of northward planting of Brassica napus. *Scientia Agricultura Sinica*. 2020;53(20):4164–76. <https://doi.org/10.38864/j.issn.0578-1752.2020.20.006>
4. Zhu J-K. Abiotic Stress Signaling and Responses in Plants. *Cell*. 2016;167(2):313–24. <https://doi.org/10.1016/j.cell.2016.08.029> PMID: 27716505
5. Liu Z, Wei J, Cui J, Wu Z, Fan Y, Dong X. Status, existing problems and strategy discussion on northward expansion of winter rapeseed in China. *Scientia Agricultura Sinica*. 2023;56(15):2854–62. <https://doi.org/10.3864/j.issn.0578-1752.2023.15.002>
6. Liu Z, Dong X, Cao X, Xu C, Wei J, Zhen G, et al. QTL mapping for cold tolerance and higher overwintering survival rate in winter rapeseed (*Brassica napus*). *J Plant Physiol*. 2022;275:153735. <https://doi.org/10.1016/j.jplph.2022.153735> PMID: 35687944
7. Dong X, Liu Z, Mi W, Xu C, Xu M, Zhou Y, et al. Overexpression of BrAFP1 gene from winter rapeseed (*Brassica rapa*) confers cold tolerance in Arabidopsis. *Plant Physiol Biochem*. 2020;155:338–45. <https://doi.org/10.1016/j.plaphy.2020.07.011> PMID: 32798902
8. Dong X, Liu Z, Wei J, Zheng G, Li H, Wang Y, et al. The BrAFP1 promoter drives gene-specific expression in leaves and stems of winter rapeseed (*Brassica rapa* L.) under cold induction. *Plant Sci*. 2023;331:111669. <https://doi.org/10.1016/j.plantsci.2023.111669> PMID: 36870371
9. Chao WS, Li X, Horvath DP, Anderson JV. Genetic loci associated with freezing tolerance in a European rapeseed (*Brassica napus* L.) diversity panel identified by genome-wide association mapping. *Plant Direct*. 2022;6(5):e405. <https://doi.org/10.1002/pld3.405> PMID: 35647480
10. Chao WS, Horvath DP, Stamm MJ, Anderson JV. Genome-Wide Association Mapping of Freezing Tolerance Loci in Canola (*Brassica napus* L.). *Agronomy*. 2021;11(2):233. <https://doi.org/10.3390/agronomy11020233>
11. Wrucke DF, Mamidi S, Rahman M. Genome-wide association study for frost tolerance in canola (*Brassica napus* L.) under field conditions. *J Plant Biochem Biotechnol*. 2018;28(2):211–22. <https://doi.org/10.1007/s13562-018-0472-8>
12. Fiebelkorn D, Horvath D, Rahman M. Genome-wide association study for electrolyte leakage in rapeseed/canola (*Brassica napus* L.). *Mol Breeding*. 2018;38(11). <https://doi.org/10.1007/s11032-018-0892-0>
13. Takahashi D, Uemura M, Kawamura Y. Freezing Tolerance of Plant Cells: From the Aspect of Plasma Membrane and Microdomain. *Adv Exp Med Biol*. 2018;1081:61–79. [https://doi.org/10.1007/978-981-13-1244-1\\_4](https://doi.org/10.1007/978-981-13-1244-1_4) PMID: 30288704
14. Mi W, Liu Z, Jin J, Dong X, Xu C, Zou Y, et al. Comparative proteomics analysis reveals the molecular mechanism of enhanced cold tolerance through ROS scavenging in winter rapeseed (*Brassica napus* L.). *PLoS One*. 2021;16(1):e0243292. <https://doi.org/10.1371/journal.pone.0243292> PMID: 33434207
15. Xuan L, Yan T, Lu L, Zhao X, Wu D, Hua S, et al. Genome-wide association study reveals new genes involved in leaf trichome formation in polyploid oilseed rape (*Brassica napus* L.). *Plant Cell Environ*. 2019;43(3):675–91. <https://doi.org/10.1111/pce.13694> PMID: 31889328
16. Wu D, Liang Z, Yan T, Xu Y, Xuan L, Tang J, et al. Whole-Genome Resequencing of a Worldwide Collection of Rapeseed Accessions Reveals the Genetic Basis of Ecotype Divergence. *Mol Plant*. 2019;12(1):30–43. <https://doi.org/10.1016/j.molp.2018.11.007> PMID: 30472326
17. Wei J, Zheng G, Dong X, Li H, Liu S, Wang Y, et al. Integration of transcriptome and proteome analysis reveals the mechanism of freezing tolerance in winter rapeseed. *Plant Growth Regul*. 2021;96(1):103–18. <https://doi.org/10.1007/s10725-021-00763-z>
18. Chen M-X, Zhu F-Y, Wang F-Z, Ye N-H, Gao B, Chen X, et al. Alternative splicing and translation play important roles in hypoxic germination in rice. *J Exp Bot*. 2018;70(3):817–33. <https://doi.org/10.1093/jxb/ery393> PMID: 30535157
19. Wei J, Liu X, Li L, Zhao H, Liu S, Yu X, et al. Quantitative proteomic, physiological and biochemical analysis of cotyledon, embryo, leaf and pod reveals the effects of high temperature and humidity stress on seed vigor formation in soybean. *BMC Plant Biol*. 2020;20(1):127. <https://doi.org/10.1186/s12870-020-02335-1> PMID: 32216758
20. Sena F, Monza J, Signorelli S. Determination of Free Proline in Plants. *Methods Mol Biol*. 2024;2798:183–94. [https://doi.org/10.1007/978-1-0716-3826-2\\_12](https://doi.org/10.1007/978-1-0716-3826-2_12) PMID: 38587743
21. Langmead B, Salzberg SL. Fast gapped-read alignment with Bowtie 2. *Nat Methods*. 2012;9(4):357–9. <https://doi.org/10.1038/nmeth.1923> PMID: 22388286
22. Liu Z-G, Zhang C-S, Sun W-C, Yang N-N, Wang Y, He L, et al. Comparison of Winter Rapeseed Varieties (Lines) with Different Cold Resistance Planted in the Northern-Extending Regions in China under Low Temperature before Winter. *Acta Agronomica Sinica*. 2014;40(2):346. <https://doi.org/10.3724/sp.j.1006.2014.00346>
23. Yamada T, Kuroda K, Jitsuyama Y, Takezawa D, Arakawa K, Fujikawa S. Roles of the plasma membrane and the cell wall in the responses of plant cells to freezing. *Planta*. 2002;215(5):770–8. <https://doi.org/10.1007/s00425-002-0814-5> PMID: 12244442
24. Yang J-W, Park S-U, Lee H-U, Nam KJ, Lee K-L, Lee JJ, et al. Differential Responses of Antioxidant Enzymes and Lignin Metabolism in Susceptible and Resistant Sweetpotato Cultivars during Root-Knot Nematode Infection. *Antioxidants (Basel)*. 2023;12(6):1164. <https://doi.org/10.3390/antiox12061164> PMID: 37371894
25. Han X, Yao F, Xue T-T, Wang Z-L, Wang Y, Cao X, et al. Sprayed biodegradable liquid film improved the freezing tolerance of cv. Cabernet Sauvignon by up-regulating soluble protein and carbohydrate levels and alleviating oxidative damage. *Front Plant Sci*. 2022;13:1021483. <https://doi.org/10.3389/fpls.2022.1021483> PMID: 36388526
26. Phan H, Schläppi M. Low Temperature Antioxidant Activity QTL Associate with Genomic Regions Involved in Physiological Cold Stress Tolerance Responses in Rice (*Oryza sativa* L.). *Genes (Basel)*. 2021;12(11):1700. <https://doi.org/10.3390/genes12111700> PMID: 34828305
27. Khatab AA, Li J, Hu L, Yang J, Fan C, Wang L, et al. Global identification of quantitative trait loci and candidate genes for cold stress and chilling acclimation in rice through GWAS and RNA-seq. *Planta*. 2022;256(4):82. <https://doi.org/10.1007/s00425-022-03995-z> PMID: 36103054

28. Wei Z, Yuan Q, Lin H, Li X, Zhang C, Gao H, et al. Linkage analysis, GWAS, transcriptome analysis to identify candidate genes for rice seedlings in response to high temperature stress. *BMC Plant Biol.* 2021;21(1):85. <https://doi.org/10.1186/s12870-021-02857-2> PMID: [33563229](https://pubmed.ncbi.nlm.nih.gov/33563229/)
29. Salami M, Heidari B, Alizadeh B, Batley J, Wang J, Tan X-L, et al. Dissection of quantitative trait nucleotides and candidate genes associated with agronomic and yield-related traits under drought stress in rapeseed varieties: integration of genome-wide association study and transcriptomic analysis. *Front Plant Sci.* 2024;15:1342359. <https://doi.org/10.3389/fpls.2024.1342359> PMID: [38567131](https://pubmed.ncbi.nlm.nih.gov/38567131/)
30. Salami M, Heidari B, Batley J, Wang J, Tan X-L, Richards C, et al. Integration of genome-wide association studies, metabolomics, and transcriptomics reveals phenolic acid- and flavonoid-associated genes and their regulatory elements under drought stress in rapeseed flowers. *Front Plant Sci.* 2024;14:1249142. <https://doi.org/10.3389/fpls.2023.1249142> PMID: [38273941](https://pubmed.ncbi.nlm.nih.gov/38273941/)
31. Abdelrahman M, Nishiyama R, Tran CD, Kusano M, Nakabayashi R, Okazaki Y, et al. Defective cytokinin signaling reprograms lipid and flavonoid gene-to-metabolite networks to mitigate high salinity in Arabidopsis. *Proc Natl Acad Sci U S A.* 2021;118(48):e2105021118. <https://doi.org/10.1073/pnas.2105021118> PMID: [34815339](https://pubmed.ncbi.nlm.nih.gov/34815339/)
32. Xia H, Ni Z, Hu R, Lin L, Deng H, Wang J, et al. Melatonin Alleviates Drought Stress by a Non-Enzymatic and Enzymatic Antioxidative System in Kiwifruit Seedlings. *Int J Mol Sci.* 2020;21(3):852. <https://doi.org/10.3390/ijms21030852> PMID: [32013029](https://pubmed.ncbi.nlm.nih.gov/32013029/)
33. Puranik S, Sahu PP, Srivastava PS, Prasad M. NAC proteins: regulation and role in stress tolerance. *Trends Plant Sci.* 2012;17(6):369–81. <https://doi.org/10.1016/j.tplants.2012.02.004> PMID: [22445067](https://pubmed.ncbi.nlm.nih.gov/22445067/)
34. Habet V, Li N, Qi J, Peng G, Charkoftaki G, Vasilou V, et al. Integrated Analysis of Tracheobronchial Fluid from Before and After Cardiopulmonary Bypass Reveals Activation of the Integrated Stress Response and Altered Pulmonary Microvascular Permeability. *Yale J Biol Med.* 2023;96(1):23–42. <https://doi.org/10.59249/KFYZ8002> PMID: [37009190](https://pubmed.ncbi.nlm.nih.gov/37009190/)
35. Dai Y, Zhang L, Sun X, Li F, Zhang S, Zhang H, et al. Transcriptome analysis reveals anthocyanin regulation in Chinese cabbage (*Brassica rapa* L.) at low temperatures. *Sci Rep.* 2022;12(1):6308. <https://doi.org/10.1038/s41598-022-10106-1> PMID: [35428824](https://pubmed.ncbi.nlm.nih.gov/35428824/)
36. Galpaz N, Reymond M. Natural Variation in Arabidopsis thaliana Revealed a Genetic Network Controlling Germination Under Salt Stress. *PLoS ONE.* 2010;5(12):e15198. <https://doi.org/10.1371/journal.pone.0015198>
37. Huijie L, Heng X, Qiu W, Xiaofang L, Hua Z, Ying Z. Roles of bzip transcription factors in plant growth and development and abiotic stress response. *Acta Agric Zhejiang.* 2019;31(7):1025. <https://doi.org/10.3969/j.issn.1004-1524.2019.07.22>
38. Bi C, Yu Y, Dong C, Yang Y, Zhai Y, Du F, et al. The bZIP transcription factor TabZIP15 improves salt stress tolerance in wheat. *Plant Biotechnol J.* 2020;19(2):209–11. <https://doi.org/10.1111/pbi.13453> PMID: [32702168](https://pubmed.ncbi.nlm.nih.gov/32702168/)
39. Zhao P, Ye M, Wang R, Wang D, Chen Q. Systematic identification and functional analysis of potato (*Solanum tuberosum* L.) bZIP transcription factors and overexpression of potato bZIP transcription factor StbZIP-65 enhances salt tolerance. *Int J Biol Macromol.* 2020;161:155–67. <https://doi.org/10.1016/j.ijbiomac.2020.06.032> PMID: [32512099](https://pubmed.ncbi.nlm.nih.gov/32512099/)
40. Li P, Zheng T, Li L, Wang J, Cheng T, Zhang Q. Genome-wide investigation of the bZIP transcription factor gene family in *Prunus mume*: Classification, evolution, expression profile and low-temperature stress responses. *Horticultural Plant Journal.* 2022;8(2):230–42. <https://doi.org/10.1016/j.hpj.2021.01.009>
41. Zuo J, Li J. Molecular genetic dissection of quantitative trait loci regulating rice grain size. *Annu Rev Genet.* 2014;48:99–118. <https://doi.org/10.1146/annurev-genet-120213-092138> PMID: [25149369](https://pubmed.ncbi.nlm.nih.gov/25149369/)
42. Li C, Liu J, Bian J, Jin T, Zou B, Liu S, et al. Identification of cold tolerance QTLs at the bud burst stage in 211 rice landraces by GWAS. *BMC Plant Biol.* 2021;21(1):542. <https://doi.org/10.1186/s12870-021-03317-7> PMID: [34800993](https://pubmed.ncbi.nlm.nih.gov/34800993/)
43. Huang Z, Zhao N, Qin M, Xu A. Mapping of quantitative trait loci related to cold resistance in *Brassica napus* L. *J Plant Physiol.* 2018;231:147–54. <https://doi.org/10.1016/j.jplph.2018.09.012> PMID: [30268695](https://pubmed.ncbi.nlm.nih.gov/30268695/)
44. Guo L, Lu S, Liu T, Nai G, Ren J, Gou H, et al. Genome-Wide Identification and Abiotic Stress Response Analysis of PP2C Gene Family in Woodland and Pineapple Strawberries. *Int J Mol Sci.* 2023;24(4):4049. <https://doi.org/10.3390/ijms24044049> PMID: [36835472](https://pubmed.ncbi.nlm.nih.gov/36835472/)
45. Wang J, Li C, Li L, Gao L, Hu G, Zhang Y, et al. DIW1 encoding a clade I PP2C phosphatase negatively regulates drought tolerance by dephosphorylating TaSnRK1.1 in wheat. *J Integr Plant Biol.* 2023;65(8):1918–36. <https://doi.org/10.1111/jipb.13504> PMID: [37158049](https://pubmed.ncbi.nlm.nih.gov/37158049/)
46. Huang X, Liang Y, Zhang R, Zhang B, Song X, Liu J, et al. Genome-Wide Identification of the PP2C Gene Family and Analyses with Their Expression Profiling in Response to Cold Stress in Wild Sugarcane. *Plants (Basel).* 2023;12(13):2418. <https://doi.org/10.3390/plants12132418> PMID: [37446979](https://pubmed.ncbi.nlm.nih.gov/37446979/)
47. Zheng G, Dong X, Wei J, Liu Z, Aslam A, Cui J, et al. Integrated methylome and transcriptome analysis unravel the cold tolerance mechanism in winter rapeseed (*Brassica napus* L.). *BMC Plant Biol.* 2022;22(1):414. <https://doi.org/10.1186/s12870-022-03797-1> PMID: [36008781](https://pubmed.ncbi.nlm.nih.gov/36008781/)
48. Wang P, Duan W, Takabayashi A, Endo T, Shikanai T, Ye J-Y, et al. Chloroplastic NAD(P)H dehydrogenase in tobacco leaves functions in alleviation of oxidative damage caused by temperature stress. *Plant Physiol.* 2006;141(2):465–74. <https://doi.org/10.1104/pp.105.070490> PMID: [16428601](https://pubmed.ncbi.nlm.nih.gov/16428601/)
49. Li S. Novel insight into functions of ascorbate peroxidase in higher plants: More than a simple antioxidant enzyme. *Redox Biol.* 2023;64:102789. <https://doi.org/10.1016/j.redox.2023.102789> PMID: [37352686](https://pubmed.ncbi.nlm.nih.gov/37352686/)
50. Shen L, Zhou Y, Yang X. Genome-wide identification of ascorbate peroxidase (APX) gene family and the function of SmAPX2 under high temperature stress in eggplant. *Scientia Horticulturae.* 2024;326:112744. <https://doi.org/10.1016/j.scienta.2023.112744>

51. Ma L, Qi W, Bai J, Li H, Fang Y, Xu J, et al. Genome-Wide Identification and Analysis of the Ascorbate Peroxidase (APX) Gene Family of Winter Rapeseed (*Brassica rapa* L.) Under Abiotic Stress. *Front Genet.* 2022;12:753624. <https://doi.org/10.3389/fgene.2021.753624> PMID: [35126448](https://pubmed.ncbi.nlm.nih.gov/35126448/)
52. Shi X, Bao J, Lu X, Ma L, Zhao Y, Lan S, et al. The mechanism of Ca<sup>2+</sup> signal transduction in plants responding to abiotic stresses. *Environmental and Experimental Botany.* 2023;216:105514. <https://doi.org/10.1016/j.envexpbot.2023.105514>
53. Kang Y, Liu W, Guan C, Guan M, He X. Evolution and functional diversity of lipoxygenase (LOX) genes in allotetraploid rapeseed (*Brassica napus* L.). *Int J Biol Macromol.* 2021;188:844–54. <https://doi.org/10.1016/j.ijbiomac.2021.08.082> PMID: [34416264](https://pubmed.ncbi.nlm.nih.gov/34416264/)
